# Supplementary material
Source: Springer Nature journal article supplement (https://www.springermedizin.de/resource/supplementary/13550_2013_164_MOESM1_ESM.pdf/9687706)

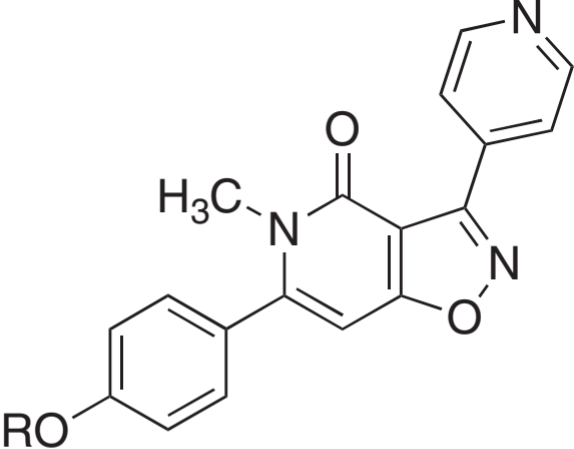

MMPIP: R = CH<sub>3</sub>

[<sup>11</sup>C]MMPIP: R = <sup>11</sup>CH<sub>3</sub>

Supplement: MOESM1 [file 9687706]
